# Supplementary material for: Slow Co-Evolution of the MAGO and Y14 Protein Families Is Required for the Maintenance of Their Obligate Heterodimerization Mode
Source: PubMed Central journal article supplement (PMC3885619; doi:10.1371/journal.pone.0084842), 2014-01-08
Supplement: pone.0084842.s004.pdf [file pone.0084842.s004.pdf]

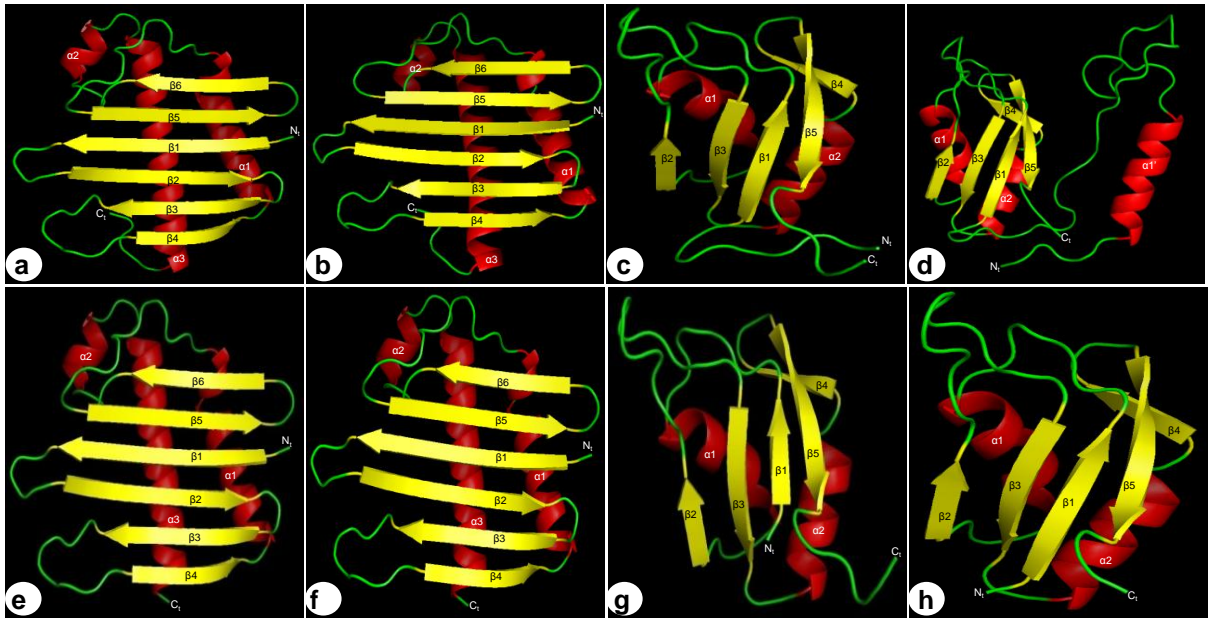

**Figure S1.** Predictions of tertiary structure of the rice MAGO and Y14 proteins.

**(a)** and **(b)** Tertiary structure prediction of OsMAGO1 and OsMAGO2. **(c)** and **(d)** Tertiary structure prediction of OsY14a and OsY14b. **(e-h)** The predicted tertiary structure of the minimal interaction domains (MIDs) of the rice MAGO and Y14 proteins. The MIDs were determined by yeast two-hybrid system (Figure 7). **(e)**  $\Delta$ OsMAGO1 (E<sub>12</sub> to L<sub>147</sub>) and **(f)**  $\Delta$ OsMAGO2 (E<sub>16</sub> to L<sub>151</sub>) have a similar structure to these of the native proteins in **a** and **b**. **(g)**  $\Delta$ OsY14a (V<sub>34</sub> to K<sub>115</sub>) and **(h)**  $\Delta$ OsY14b (G<sub>66</sub> to K<sub>145</sub>) feature the same structure to OsY14a in **c**. Ct and Nt: C- and N-terminal;  $\alpha$  and  $\beta$ :  $\alpha$ -helix and  $\beta$ -sheet.

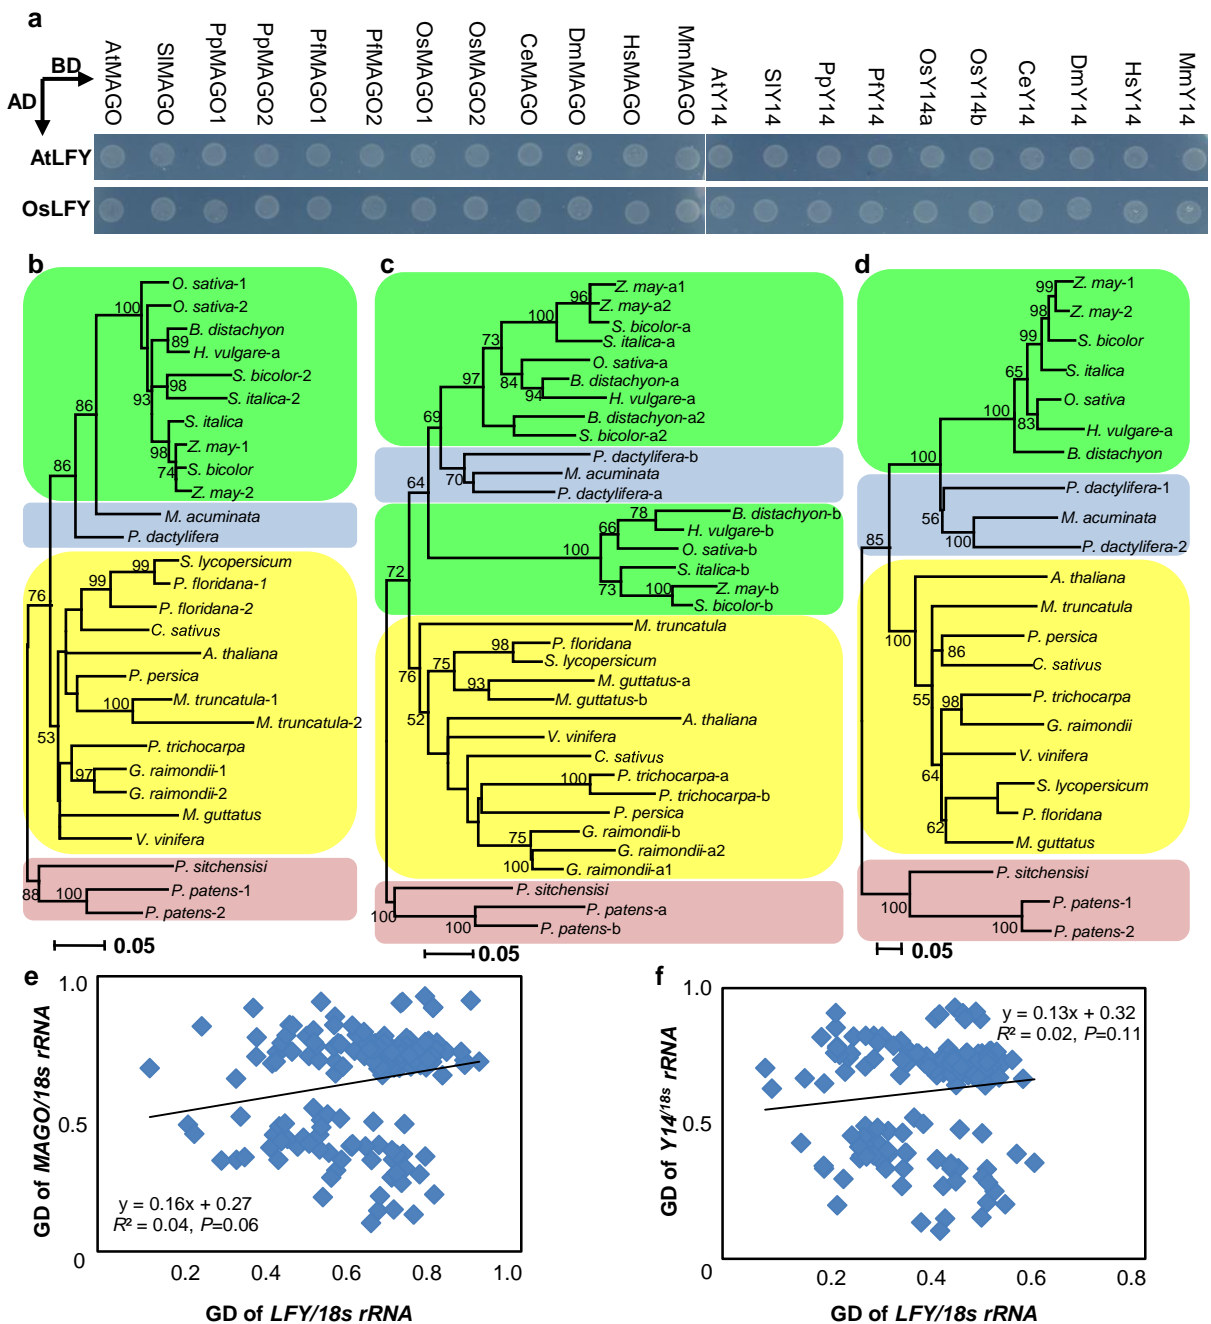

**Figure S2.** The LFY family did not co-evolve with either MAGO or Y14 family in plants.

**(a)** Interactions of LFY with either MAGO or Y14 proteins. The AtLFY and OsLFY were included as preys (AD), while the MAGO and Y14 proteins are indicated as baits (BD). The co-transformed yeast cells harboring the BD and AD constructs were selected on the SD/-Leu/-Trp/-His/-Ade plates. No cell growth indicated that AtLFY and OsLFY did not interact with either MAGO or Y14 proteins. **(b)** Phylogenetic tree of the MAGO family in plants. **(c)** Phylogenetic tree of the Y14 family in plants. **(d)** Phylogenetic tree of the LFY family in plants. These ML trees include sequences from dicots (yellow), monocots (cereals in green and others in blue), and gymnosperm and moss (purple). **(e-f)** Evaluation of tree similarity. Genetic distances (GD) between the MAGO and Y14 with the LFY sequences were corrected by 18s rRNA to avoid a contribution of speciation. **(e)** Tree similarity of the MAGO and LFY families. **(f)** Tree similarity of the Y14 and LFY families. No correlation between the LFY and MAGO trees ( $R = 0.19$ ;  $P = 0.06$ ) or between the LFY and Y14 trees ( $R = 0.12$ ;  $P = 0.11$ ) indicates no co-evolution of the LFY family with either MAGO or Y14 family.

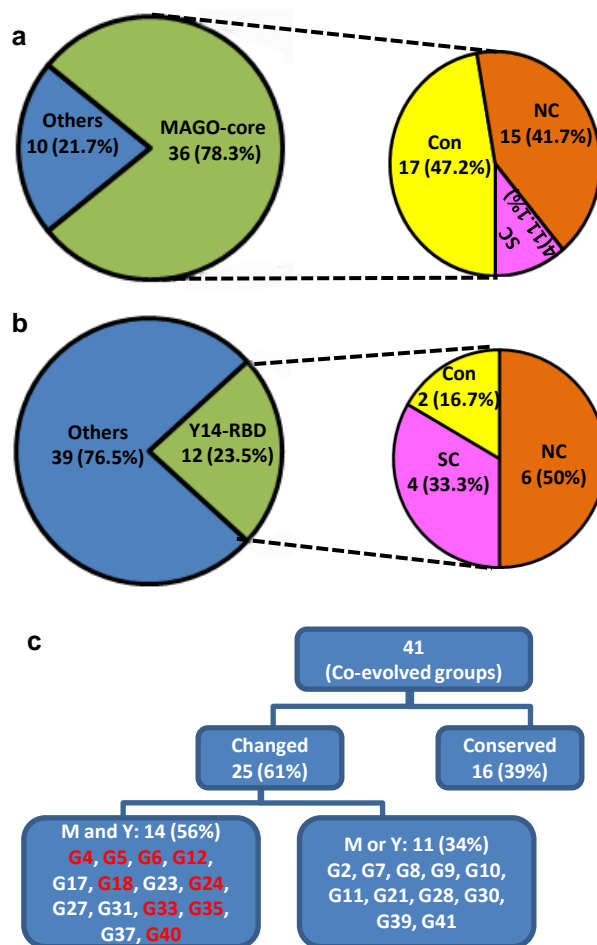

**Figure S3.** Distribution of the co-evolved residues and groups between the MAGO and Y14 families.

(a) The co-evolved residues in the MAGO family. (b) The co-evolved residues in the Y14 family. In each functional domain (MAGO-core or Y14-RBD), NC represents the sites with non-synonymous changes; SC represents the sites with synonymous changes; the conserved (Con) stands for the sites unchanged. The 'Others' includes the N- and C- terminals of the proteins. The number of the co-mutational residues is given out of the bracket and the percentage on the corresponding total number is given in bracket. (c) The co-mutational groups between the MAGO and Y14 families. The 'Conserved' indicates that the functional domains sites in the groups were not changed in both proteins. The 'Changed' indicates that the functional domains sites in the groups were changed in one of the two proteins. The number of the co-mutational groups is given out of the bracket and the percentage on the total number is given in the bracket. M and Y include the co-changed residues in the functional domains of both MAGO (M) and Y14 (Y) families, while M or Y is groups that the residues from one protein family were changed. The groups in red were formed by the clade-specific residues (Table S5; Figure 6).

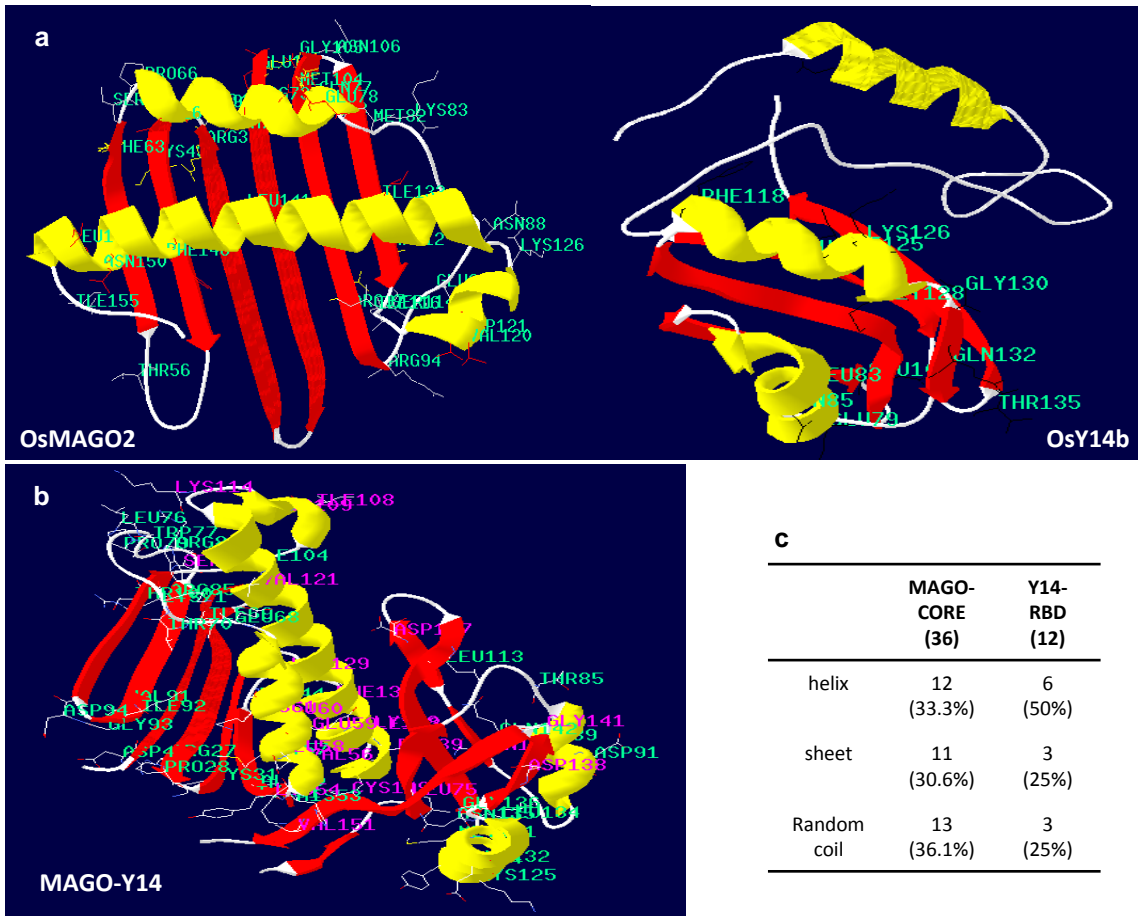

**Figure S4.** Location of the correlated residues on the tertiary structures of the MAGO and Y14 proteins. **(a)** Distribution of the correlated residues on the rice proteins. OsMAGO2 and OsY14b were set as templates. The co-evolved sites predicted by CAPS or the clade-specific sites were highlighted as amino acid (AA) followed by its position. **(b)** Location of the correlated residues on the MAGO-Y14 structure. The crystallized structure of human Magoh-Y14 was set as a template [30]. The residues distributed in the interaction interface of the MAGO-Y14 complex are highlighted in meganta. 17 (P<sub>66</sub>, V<sub>68</sub>, L<sub>69</sub>, A<sub>72</sub>, R<sub>73</sub>, Q<sub>77</sub>, E<sub>78</sub>, V<sub>120</sub>, D<sub>121</sub>, Y<sub>126</sub>, I<sub>133</sub>, L<sub>141</sub>, F<sub>146</sub>, N<sub>150</sub>, L<sub>151</sub> and I<sub>155</sub>) of the 36 co-evolved sites in the MAGO-core corresponding to OsMAGO2, and 7 (P<sub>66</sub>, R<sub>70</sub>, A<sub>72</sub>, I<sub>116</sub>, D<sub>121</sub>, I<sub>133</sub> and N<sub>150</sub>) of 15 clade-specific sites were in the interacting interface. Corresponding to OsY14b, 4 (L<sub>69</sub>, E<sub>101</sub>, Q<sub>132</sub> and T<sub>135</sub>) of 12 coevolved sites in Y14-RBD, and 5 (D<sub>95</sub>, A<sub>107</sub>, R<sub>136</sub>, A<sub>143</sub> and S<sub>145</sub>) of 12 clade-specific sites were also in the interacting interface. **(c)** The distribution of the co-evolved residues in the interaction interface and the minimal interaction domains. The interacting interfaces were helices (in yellow) and random coils (in white) in the MAGO-core (AA<sub>66-78</sub> and AA<sub>114-158</sub>) and sheets (in red) and random coils in the Y14-RBD (AA<sub>58-73</sub>, AA<sub>95-115</sub> and AA<sub>132-149</sub>), respectively. They largely overlapped with the minimal interaction domains that we determined in yeast. Thus, the co-evolution between the MAGO and Y14 families is required for the maintenance of their obligate heterodimerization mode.

**Table S1.** Primer information for protein-protein interactions in yeast two-hybrid assays.

| Gene name         | Sequences (5'-3')                  |                                    |
|-------------------|------------------------------------|------------------------------------|
| <i>OsMAGO1</i>    | F:ATGGCGACGGTGGCCGGC;              | R:TGAAAGGAGCTCAAGATTGA;            |
| <i>OsMAGO2</i>    | F:ATGGCGACGGGCGGCGCC;              | R:TGAAAGGAGCTCAAGATTGA;            |
| <i>OsMAGO1</i>    | F:ATCCATGGCGACGGTGGCCGGC;          | R:TGGATCCTGAAAGGAGCTCAAGATTGA;     |
| <i>OsMAGO2</i>    | F:ATCCATGGCGACGGGCGGCGCC;          | R:ATGGATCCTGAAAGGAGCTCAAGATTGA;    |
| <i>OsY14a</i>     | F:ATCCATGGCTGCGGTGACCAACGC;        | R:ATGGATCCTCAGTATCTTCTCCTCGGTG;    |
| <i>OsY14b</i>     | F:AACCATGGCGGCGGCGGCGGAGGACG;      | R:ATGGATCCAGTCAACATGTCAAGGCAG;     |
| <i>AtMAGO</i>     | F:ATCCATGGCCGCGGAAGAAGCGACG;       | R:ATGGATCCTAGATAGGCTTGATTTTGAAG;   |
| <i>AtY14</i>      | F:ATCCATGGTCAGTCGGCGAAACGGGAAG;    | R:ACGGATCCCAAATCATACAATCAGTAACG;   |
| <i>SIMAGO</i>     | F:ATCCATGGACAGAAGAGGGCAAATATG;     | R:AAGGATCCAGCTAACGTTTAAACATACGC;   |
| <i>SIY14</i>      | F:AACCATGGCGAACCCGGAGGAGGCTG;      | R:ATGGATCCTTGCAAATAGGTGTGTGC;      |
| <i>Pp/PfMAGO1</i> | F:GGCCATGGGGGAATTGGAAGAGAATG;      | R:ATGGATCCGGGTTTGATCTTGAAATGGAG;   |
| <i>Pp/PfMAGO2</i> | F:GGCCATGGGGGAGATGGCAGAGAAC;       | R:ATGGATCCGGGTTTGATCTTGAAATGGAG;   |
| <i>Pp/PfY14</i>   | F:ATCCATGGGGAACGGGGAGGAGGCAG;      | R:ATGGATCCTTAGTATCTCCTCCTGGGACTTC; |
| <i>CeMAGO</i>     | F:ATCCATGGACATGAGCGGCGAAGAAGAGAAG; | R:ATGGATCCGATTGGCTTGATCTTGAAGTG;   |
| <i>CeY14</i>      | F:ATCCATGGACATGAGCGACAACGAAGTAGAG; | R:ATGGATCCTCAGCGCTTCCAGAAGTCTTC;   |
| <i>DmMAGO</i>     | F:ATCCATGGTCATGTCCACGGAGGACTTTTAC; | R:ATGGATCCGGCTACGGCTTATATGGGCTTG;  |
| <i>DmY14</i>      | F:ATCCATGGCCGATGTGTTGGACATTG;      | R:ATGGATCCTTATCTGCGACGCTTTTCGGAC;  |
| <i>HsMAGO</i>     | F:ATCCATGGCTGTGGCTAGCGATTTTC;      | R:CCGAATTCACAAACAGCCTGAAAAACATAC;  |
| <i>HsY14</i>      | F:ATGAATTCATGGCGGACGTGCTAGATCTTC;  | R:ATGGATCCTCAGCGACGTCTCCGGTCTGG;   |
| <i>MmMAGO</i>     | F:ATCCATGGTATAGCGGGCTTACCAGAG;     | R:CCGAATTCAAAACATCCCATTCAAATTGG;   |
| <i>MmY14</i>      | F:CCGAATTCAGCGCCGAGAGAAGCAAGATG;   | R:ACGGATCCGAGACCACCCAGTCGACAGAG;   |
| <i>OsLFY</i>      | F:ATCATATGGATCCCAACGATGCCTTCTCG;   | R:ATGAATTCTCCGGCGAGCTTAGAACAAGGG;  |
| <i>AtLFY</i>      | F:ATCCATGGATCCTGAAGGTTTCACGAG;     | R:ATGAATTCTAGAAACGCAAGTCGTCCGCC;   |
| <i>AtMAGOm64</i>  | F:CTCAAGGAAGCCAAGCGTATCGTCTCCGAG;  | R:CTCGGAGACGATACGCTTGGCTTCCCTTGAG; |
| <i>AtMAGOm142</i> | F:ATCCATGGCCGCGGAAGAAGCGACG;       | R:AGGCTTGATTTTGAAGTGCAGATTGATGAG;  |
| <i>AtY14m154</i>  | F:AGCGCTATTAAGCAATGAATGGTGTCTGAG;  | R:CTCAGCACCATTTCATTGCTTAAATAGCGCT; |

**Table S2.** Primer information for determining the minimal interaction domains of the rice MAGO and Y14.

| Usage                     | Primer name          | Sequence 5'-3'                         |
|---------------------------|----------------------|----------------------------------------|
| OsMAGO1<br>deletion assay | <i>OsMAGO1delF1</i>  | F:ATCCATGGACGATGGCGGGCGGCGCGGT;        |
|                           | <i>OsMAGO1delF2</i>  | F:ATCCATGGAGTTCTACCTGCGGTACTAC;        |
|                           | <i>OsMAGO1delF3</i>  | F:ATCCATGGTGGGGCACAAGGGGAAGTTC;        |
|                           | <i>OsMAGO1delF4</i>  | F:ATCCATGGGGCACGAGTTCCTGGAGTTC;        |
|                           | <i>OsMAGO1delF5</i>  | F:ATCCATGGAGTTCGAGTTCGGGCCCGAC;        |
|                           | <i>OsMAGO1delF6</i>  | F:ATCCATGGGGAAGCTCCGGTACGCCAAC;        |
|                           | <i>OsMAGO1delF7</i>  | F:ATCCATGGCCAACAACCTCCAACACAAGAAG;     |
|                           | <i>OsMAGO1delF8</i>  | F:ATCCATGGACACCATGATCCGCAAGGAG;        |
|                           | <i>OsMAGO1delF9</i>  | F:ATCCATGGTGTTCGTCTCCCCCTCC;           |
|                           | <i>OsMAGO1delF10</i> | F:ATCCATGGTCCTCCGCGAGGCCACCAGG;        |
|                           | <i>OsMAGO1delR1</i>  | F:ATGGATCCTCAAATGGGCTTGATCTTGAAGTG;    |
|                           | <i>OsMAGO1delR2</i>  | F:ATGGATCCTCAGAGATTGATGAGTGAAAACAC;    |
|                           | <i>OsMAGO1delR3</i>  | F:ATGGATCCTCAGAAGCACTTAAGATCCTGGAC;    |
|                           | <i>OsMAGO1delR4</i>  | F:ATGGATCCTCAGAGGTAGTAGAAGATGCGGAG;    |
|                           | <i>OsMAGO1delR5</i>  | F:ATGGATCCTCAGCCCTCGGGTCTGGCTGGT;      |
|                           | <i>OsMAGO1delR6</i>  | F:ATGGATCCTCACTGGACGTCGACGAGGGAGCC;    |
|                           | <i>OsMAGO1delR7</i>  | F:ATGGATCCTCAGATCTTGGAGGTGTGAAGGA;     |
|                           | <i>OsMAGO1delR8</i>  | F:ATGGATCCTCAGATGTGCTCGTTCCCCATCAC;    |
|                           | <i>OsMAGO1delR9</i>  | F:ATGGATCCTCAGATCTCCAGCTCCTGCCTTCC;    |
|                           | <i>OsMAGO1delR10</i> | F:ATGGATCCTCACACGCGTCTGGCTCCGGCCA;     |
| OsMAGO2<br>deletion assay | <i>OsMAGO2delF2</i>  | F:ATCCATGGAGTTCTACCTGCGGTACTAC;        |
|                           | <i>OsMAGO2delR2</i>  | F:ATGGATCCTCAGAGATTGATGAGTGAAAACAC;    |
| OsY14a<br>deletion assay  | <i>OsY14adelF1</i>   | F:ATCCATGGTGCTAGTCACTGGGGTTCAT;        |
|                           | <i>OsY14adelF2</i>   | F:ATCCATGGAAGAAGCTCAGGAAGATG;          |
|                           | <i>OsY14adelF3</i>   | F:ATCCATGGATCTTCACAATATTTCCGG;         |
|                           | <i>OsY14adelF4</i>   | F:ATCCATGGACTTTGGGCAGGTCAAGAAC;        |
|                           | <i>OsY14adelF5</i>   | F:ATCCATGGATCGCCGAACCTGGATTCTGTG;      |
|                           | <i>OsY14adelF6</i>   | F:ATCCATGGTGAAGGGATATGCTCTTATTG;       |
|                           | <i>OsY14adelF7</i>   | F:ATCCATGGAGTATGAACTTTTCGAGG;          |
|                           | <i>OsY14adelF8</i>   | F:ATCCATGGCTCAGGCTGCAATAAAAGC;         |
|                           | <i>OsY14adelF9</i>   | F:ATCCATGGCATTGGATGGAACCTGAG;          |
|                           | <i>OsY14adelF10</i>  | F:ATCCATGGAGCTTCTAACACAAATC;           |
|                           | <i>OsY14adelR1</i>   | F:ATGGATCCTCAGGATCTGGAGCGTCTTGGTG;     |
|                           | <i>OsY14adelR2</i>   | F:ATGGATCCTCATCTCTCCGAATATTCCTGCG;     |
|                           | <i>OsY14adelR3</i>   | F:ATGGATCCTCACTTGACAGGGCCATTACTAAATGC; |
|                           | <i>OsY14adelR4</i>   | F:ATGGATCCTCACCA ATCAACACTTATGATTTG;   |
|                           | <i>OsY14adelR5</i>   | F:ATGGATCCTCATGTTAGAAGCTCAGTTCATC;     |
|                           | <i>OsY14adelR6</i>   | F:ATGGATCCTCACAATGCTTTTATTGCAGCCTG;    |
|                           | <i>OsY14adelR7</i>   | F:ATGGATCCTCAAGCTTCTCGAAAAGTTTCATAC;   |
|                           | <i>OsY14adelR8</i>   | F:ATGGATCCTCACTCAATAAGAGCATATCCC;      |
|                           | <i>OsY14adelR9</i>   | F:ATGGATCCTCACTTCACGAATCCAGTTCGGCG;    |
|                           | <i>OsY14adelR10</i>  | F:ATGGATCCTCAATCCAAATTCAAATGCAAG;      |
| OsY14b<br>deletion assay  | <i>OsY14bdelF1</i>   | F:ATCCATGGGGCCACAGCGCTCTATTGAAG;       |
|                           | <i>OsY14bdelF2</i>   | F:ATCCATGGGATGGATACTACTGGTCTCTG;       |
|                           | <i>OsY14bdelF3</i>   | F:ATCCATGGGAGTCAAAGAAGACCGCGGAAG;      |
|                           | <i>OsY14bdelF4</i>   | F:ATCCATGGAAGATGATCTGTACAACAC;         |
|                           | <i>OsY14bdelR1</i>   | F:ATGGATCCTCATAATGGCCTTGTACTGGTGAG;    |
|                           | <i>OsY14bdelR2</i>   | F:ATGGATCCTCAGAGTTTCTGTATAGGACCTCTG;   |
|                           | <i>OsY14bdelR3</i>   | F:ATGGATCCTCAGCTGAATGCCAGTCAACATAG;    |
|                           | <i>OsY14bdelR4</i>   | F:ATGGATCCTCAGACAGTCTTGTAAACAGCTG;     |

**Table S3.** Information on sequences used in the present work.

| Species                          | MAGO         |                  |             |               | Gene structure |                  |             |               | Y14           |                  |             |               | Gene structure |                  |           |                  | LFY |  |
|----------------------------------|--------------|------------------|-------------|---------------|----------------|------------------|-------------|---------------|---------------|------------------|-------------|---------------|----------------|------------------|-----------|------------------|-----|--|
|                                  | Gene name    | Accession number | Exon number | Intron number | Gene name      | Accession number | Exon number | Intron number | Gene name     | Accession number | Exon number | Intron number | Gene name      | Accession number | Gene name | Accession number |     |  |
| <i>Arabidopsis thaliana</i>      | <i>Ath</i>   | KF051000         | 3           | 2             | <i>Ath</i>     | KF051012         | 3           | 2             | <i>Ath</i>    | KF051012         | 3           | 2             | <i>Ath</i>     | KF051022         |           |                  |     |  |
| <i>Populus trichocarpa</i>       | <i>Ptr</i>   | EF144848         | 3           | 2             | <i>Ptr-a</i>   | XM_002299753     | 4           | 3             | <i>Ptr-b</i>  | XM_002314049     | 4           | 3             | <i>Ptr</i>     | XM_002322271     |           |                  |     |  |
| <i>Physalis floridana</i>        | <i>Pfl-1</i> | KF051010         | 3           | 2             | <i>Pfl</i>     | KF051015         | nd          | nd            | <i>Pfl</i>    | KF051015         | nd          | nd            | <i>Pfl</i>     | Unigene87481P106 |           |                  |     |  |
| <i>P.philadelphica</i>           | <i>Pph-1</i> | KF051009         | nd          | nd            | <i>Pph</i>     | KF051014         | nd          | nd            | <i>Pph</i>    | KF051014         | nd          | nd            | <i>Pph</i>     | nd               |           |                  |     |  |
| <i>Solanum lycopersicum</i>      | <i>Sly-1</i> | KF051001         | 3           | 2             | <i>Sly</i>     | KF051013         | 4           | 3             | <i>Sly</i>    | KF051013         | 4           | 3             | <i>Sly</i>     | Solyc03g118160   |           |                  |     |  |
| <i>Gossypium raimondii</i>       | <i>Sly-2</i> | Gorai.007G085400 | 3           | 2             | <i>Gra-a1</i>  | Gorai.013G253000 | 4           | 3             | <i>Gra-a2</i> | Gorai.006G125200 | 4           | 3             | <i>Gra</i>     | Gorai.001G053900 |           |                  |     |  |
|                                  | <i>Gra</i>   | Gorai.004G069800 | 3           | 2             | <i>Gra-b</i>   | Gorai.009G077300 | 4           | 3             | <i>Gra-b</i>  | Gorai.009G077300 | 4           | 3             | <i>Gra</i>     | Gorai.001G053900 |           |                  |     |  |
| <i>Medicago truncatula</i>       | <i>Mtr-1</i> | Medtr3g163680    | 3           | 2             | <i>Mtr</i>     | Medtr5g008930    | 4           | 3             | <i>Mtr</i>    | Medtr5g008930    | 4           | 3             | <i>Mtr</i>     | XM_003602697     |           |                  |     |  |
|                                  | <i>Mtr-2</i> | Medtr3g132960    | 3           | 2             | <i>Mtr</i>     | Medtr5g008930    | 4           | 3             | <i>Mtr</i>    | Medtr5g008930    | 4           | 3             | <i>Mtr</i>     | XM_003602697     |           |                  |     |  |
| <i>Cucumis sativus</i>           | <i>Csa</i>   | Cucsa.259980     | 3           | 2             | <i>Csa</i>     | Cucsa.055310     | 4           | 3             | <i>Csa</i>    | Cucsa.055310     | 4           | 3             | <i>Csa</i>     | XM_004137968     |           |                  |     |  |
| <i>Prunus persica</i>            | <i>Ppe</i>   | ppa012866m       | 3           | 2             | <i>Ppe</i>     | ppa007553m       | 4           | 3             | <i>Ppe</i>    | ppa007553m       | 4           | 3             | <i>Ppe</i>     | EF175869         |           |                  |     |  |
| <i>Mimulus guttatus</i>          | <i>Mgu</i>   | mgv1a015616m     | 3           | 2             | <i>Mgu-a</i>   | mgv1a014186m     | 4           | 3             | <i>Mgu-b</i>  | mgv1a01307m      | 4           | 3             | <i>Mgu</i>     | AY524036         |           |                  |     |  |
| <i>Vitis vinifera</i>            | <i>Vvi</i>   | XM_002281258     | 3           | 2             | <i>Vvi</i>     | XM_002281192     | 4           | 3             | <i>Vvi</i>    | XM_002281192     | 4           | 3             | <i>Vvi</i>     | XM_002284628     |           |                  |     |  |
|                                  | <i>Zma-1</i> | NM_001152441     | 3           | 2             | <i>Zma-a1</i>  | NM_001157087     | 4           | 3             | <i>Zma-a1</i> | NM_001157087     | 4           | 3             | <i>Zma-1</i>   | DQ343237         |           |                  |     |  |
| <i>Zea mays</i>                  | <i>Zma-2</i> | NM_001153494     | 3           | 2             | <i>Zma-a2</i>  | NM_001156826     | 4           | 3             | <i>Zma-b</i>  | NM_001156791     | 4           | 3             | <i>Zma-2</i>   | AY789045         |           |                  |     |  |
|                                  | <i>Sbi-1</i> | XM_002443679     | 3           | 2             | <i>Sbi-a1</i>  | XM_002439204     | 4           | 3             | <i>Sbi-a1</i> | XM_002439204     | 4           | 3             | <i>Sbi</i>     | XM_002446991     |           |                  |     |  |
| <i>Sorghum bicolor</i>           | <i>Sbi-2</i> | XM_002462494     | 3           | 2             | <i>Sbi-a2</i>  | XM_002466188     | 4           | 3             | <i>Sbi-b</i>  | XM_002457800     | 4           | 3             | <i>Sbi</i>     | XM_002446991     |           |                  |     |  |
|                                  | <i>Sit-1</i> | Si014566m        | 3           | 2             | <i>Sit-a</i>   | Si023278m        | 4           | 3             | <i>Sit-a</i>  | Si023278m        | 4           | 3             | <i>Sit</i>     | Si011756m        |           |                  |     |  |
| <i>Setaria italica</i>           | <i>Sit-2</i> | Si032825m        | 2           | 1             | <i>Sit-b</i>   | Si037569m        | 4           | 3             | <i>Sit-b</i>  | Si037569m        | 4           | 3             | <i>Sit</i>     | Si011756m        |           |                  |     |  |
| <i>Brachypodium distachyon</i>   | <i>Bdi-1</i> | XM_003573221     | 3           | 2             | <i>Bdi-a1</i>  | XM_003568923     | 4           | 3             | <i>Bdi-a1</i> | XM_003568923     | 4           | 3             | <i>Bdi</i>     | XM_003580387     |           |                  |     |  |
|                                  | <i>Bdi-2</i> | XM_003573221     | 3           | 2             | <i>Bdi-a2</i>  | XM_003559220     | 4           | 3             | <i>Bdi-b</i>  | Bradi2g133m      | 4           | 3             | <i>Bdi</i>     | XM_003580387     |           |                  |     |  |
|                                  | <i>Osa-1</i> | KF051011         | 3           | 2             | <i>Osa-a</i>   | KF051016         | 4           | 3             | <i>Osa-a</i>  | KF051016         | 4           | 3             | <i>Osa</i>     | KF051023         |           |                  |     |  |
| <i>Oryza sativa</i>              | <i>Osa-2</i> | KF051008         | 3           | 2             | <i>Osa-b</i>   | KF051017         | 4           | 3             | <i>Osa-b</i>  | KF051017         | 4           | 3             | <i>Osa</i>     | KF051023         |           |                  |     |  |
| <i>Hordeum vulgare</i>           | <i>Hvu</i>   | AK252690         | nd          | nd            | <i>Hvu-a</i>   | AK250786         | nd          | nd            | <i>Hvu-a</i>  | AK250786         | nd          | nd            | <i>Hvu</i>     | MLOC_14305       |           |                  |     |  |
|                                  | <i>Pda</i>   | 30s1136351g005   | 3           | 2             | <i>Hvu-b</i>   | MLOC_64220       | nd          | nd            | <i>Pda-a</i>  | 30S975321g003    | 4           | 3             | <i>Pda-1</i>   | 30s795141g001    |           |                  |     |  |
| <i>Phoenix dactylifera</i>       | <i>Pda</i>   | 30s1136351g005   | 3           | 2             | <i>Pda-b</i>   | 30s701331g002    | 4           | 3             | <i>Pda-b</i>  | 30s701331g002    | 4           | 3             | <i>Pda-2</i>   | 30s854671g005    |           |                  |     |  |
| <i>Musa acuminata</i>            | <i>Mac</i>   | Achr11T21790     | 3           | 2             | <i>Mac</i>     | Achr6G08340      | 5           | 4             | <i>Mac</i>    | Achr6G08340      | 5           | 4             | <i>Mac</i>     | Achr6T16390      |           |                  |     |  |
| <i>Picea sitchensis</i>          | <i>Psi</i>   | EF082784         | nd          | nd            | <i>Psi</i>     | EF086042         | nd          | nd            | <i>Psi</i>    | EF086042         | nd          | nd            | <i>Psi</i>     | EF087799         |           |                  |     |  |
| <i>Marsilea vestita</i>          | <i>Mve</i>   | AF329672         | nd          | nd            | <i>Mve</i>     | EU009956         | nd          | nd            | <i>Mve</i>    | EU009956         | nd          | nd            | <i>Mve</i>     | nd               |           |                  |     |  |
| <i>Physcomitrella patens</i>     | <i>Ppa-1</i> | XM_001770356     | 3           | 2             | <i>Ppa-a</i>   | XM_001758204     | 3           | 2             | <i>Ppa-a</i>  | XM_001758204     | 3           | 2             | <i>Ppa-1</i>   | XM_001762002     |           |                  |     |  |
|                                  | <i>Ppa-2</i> | XM_001763749     | 3           | 2             | <i>Ppa-b</i>   | XM_001771246     | 3           | 2             | <i>Ppa-b</i>  | XM_001771246     | 3           | 2             | <i>Ppa-2</i>   | XM_001765249     |           |                  |     |  |
| <i>Chlamydomonas reinhardtii</i> | <i>Cre</i>   | XM_001694693     | 4           | 3             | <i>Cre</i>     | XM_001696940     | 2           | 1             | <i>Cre</i>    | XM_001696940     | 2           | 1             | <i>Cre</i>     | nd               |           |                  |     |  |
| <i>Volvox carteri</i>            | <i>Vca</i>   | Vocar20010354m   | 4           | 3             | <i>Vca</i>     | XM_002953371     | 2           | 1             | <i>Vca</i>    | XM_002953371     | 2           | 1             | <i>Vca</i>     | nd               |           |                  |     |  |
| <i>Caenorhabditis elegans</i>    | <i>Cel</i>   | KF051002         | 2           | 1             | <i>Cel</i>     | KF051018         | 3           | 2             | <i>Cel</i>    | KF051018         | 3           | 2             | <i>Cel</i>     | nd               |           |                  |     |  |
| <i>Drosophila melanogaster</i>   | <i>Dme</i>   | KF051003         | 2           | 1             | <i>Dme</i>     | KF051019         | 2           | 1             | <i>Dme</i>    | KF051019         | 2           | 1             | <i>Dme</i>     | nd               |           |                  |     |  |
| <i>Danio rerio</i>               | <i>Dre</i>   | NM_001017700     | 5           | 4             | <i>Dre</i>     | NM_001013345     | 6           | 5             | <i>Dre</i>    | NM_001013345     | 6           | 5             | <i>Dre</i>     | nd               |           |                  |     |  |
| <i>Xenopus tropicalis</i>        | <i>Xtr</i>   | XM_002931425     | 5           | 4             | <i>Xtr</i>     | NM_001045682     | 4           | 3             | <i>Xtr</i>    | NM_001045682     | 4           | 3             | <i>Xtr</i>     | nd               |           |                  |     |  |
| <i>Taeniopygia guttata</i>       | <i>Tgu</i>   | NM_001245420     | 5           | 4             | <i>Tgu</i>     | NM_001245281     | 5           | 4             | <i>Tgu</i>    | NM_001245281     | 5           | 4             | <i>Tgu</i>     | nd               |           |                  |     |  |
| <i>Mus musculus</i>              | <i>Mmu</i>   | KF051005         | 5           | 4             | <i>Mmu</i>     | KF051021         | 6           | 5             | <i>Mmu</i>    | KF051021         | 6           | 5             | <i>Mmu</i>     | nd               |           |                  |     |  |
| <i>Homo sapiens</i>              | <i>Hsa</i>   | KF051004         | 5           | 4             | <i>Hsa</i>     | KF051020         | 6           | 5             | <i>Hsa</i>    | KF051020         | 6           | 5             | <i>Hsa</i>     | nd               |           |                  |     |  |
| <i>Pan troglodytes</i> *         | <i>Pt</i>    | XM_520743        | 5           | 4             | <i>Pt</i>      | XM_003806189     | 6           | 5             | <i>Pt</i>     | XM_003806189     | 6           | 5             | <i>Pt</i>      | nd               |           |                  |     |  |
| <i>Aedes aegypti</i> *           | <i>Aae</i>   | XM_001660782     | 2           | 1             | <i>Aae</i>     | XM_001652117     | 1           | 0             | <i>Aae</i>    | XM_001652117     | 1           | 0             | <i>Aae</i>     | nd               |           |                  |     |  |
| <i>Apis mellifera</i> *          | <i>Ame</i>   | XM_001120074     | 1           | 0             | <i>Ame</i>     | XM_395245        | 4           | 3             | <i>Ame</i>    | XM_395245        | 4           | 3             | <i>Ame</i>     | nd               |           |                  |     |  |
| <i>Wuchereria bancrofti</i> *    | <i>Wba</i>   | ADB01001636.1    | 3           | 2             | <i>Wba</i>     | ADB01000095.1    | 2           | 1             | <i>Wba</i>    | ADB01000095.1    | 2           | 1             | <i>Wba</i>     | nd               |           |                  |     |  |
| <i>Loa loa</i> *                 | <i>Llo</i>   | XP_003144197     | 3           | 2             | <i>Llo</i>     | EJD75995         | nd          | nd            | <i>Llo</i>    | EJD75995         | nd          | nd            | <i>Llo</i>     | nd               |           |                  |     |  |

nd: no data

\* indicate the sequences in the species were not used to construct the tree

**Table S4.** Quality factors of different protein modeling.

|                                     | <b>OsMAGO1</b>                                  | <b>OsMAGO2</b>                                  | <b>OsY14a</b>                | <b>OsY14b</b>                            |
|-------------------------------------|-------------------------------------------------|-------------------------------------------------|------------------------------|------------------------------------------|
| Modeled residue range               | 14-156                                          | 16-158                                          | 23-113                       | 12-146                                   |
| Based on template (Parent PDB )     | 1oo0 Chain A<br>X-Ray, 1.85 Å                   | 1oo0 Chain A<br>X-Ray, 1.85 Å                   | p27 Chain: B<br>X-Ray, 2.00Å | 1hl6 Chain: A<br>X-Ray, 2.50Å            |
| Sequence identity (%)               | 83.92                                           | 84.62                                           | 63.74                        | 35.56                                    |
| <i>E</i> -value                     | 2.60e-65                                        | 1.83e-66                                        | 2.39e-33                     | 6.30e-24                                 |
| QMEANscore4 (0-1)                   | 0.738                                           | 0.772                                           | 0.863                        | 0.657                                    |
| Quality information (QMEAN Z-Score) | -0.64                                           | -0.26                                           | 0.35                         | -1.51                                    |
| Template                            | <i>Drosophila</i> MAGO<br>NASHI protein<br>[15] | <i>Drosophila</i> MAGO<br>NASHI protein<br>[15] | Human Y14<br>protein<br>[30] | <i>Drosophila</i> Y14<br>Protein<br>[32] |



**Table S5.** The correlated mutation residues between the MAGO and Y14 families.

| Group | MGAO    |                    | Y14                    |                                 | Mean Dc ±SE                                    | Mean ρ ±SE |           |
|-------|---------|--------------------|------------------------|---------------------------------|------------------------------------------------|------------|-----------|
|       | Nt      | MAGO-Core (16-158) | Nt                     | Y14-RBD (69-139)                |                                                |            | Ct        |
| G1    | A6      |                    | V8                     |                                 | P166                                           | 4.39±1.55  | 0.40±0.03 |
| G2    | G13     |                    | V8, D27, R44, H 58     | K126                            | P166                                           | 5.37±0.92  | 0.36±0.01 |
| G3    |         | S114               | D27                    |                                 |                                                | 5.46±2.45  | 0.39±0.00 |
| G4    |         | F66                |                        | N85                             | A143                                           | 6.19±2.70  | 0.40±0.05 |
| G5    |         | N150               |                        | K126                            |                                                | 3.41±0.78  | 0.44±0.00 |
| G6    |         | K83                |                        | I125                            |                                                | 5.02±2.42  | 0.54±0.00 |
| G7    | A2      |                    | E17, D 27              | L83                             |                                                | 5.01±1.48  | 0.44±0.02 |
| G8    |         | R94                | L33                    | L83                             | L152                                           | 6.11±2.51  | 0.51±0.11 |
| G9    |         | G105, L69          |                        | G130                            |                                                | 3.72±1.62  | 0.44±0.05 |
| G10   |         | R39                | A2, D27                | Q132                            |                                                | 4.87±0.77  | 0.43±0.04 |
| G11   |         | K43                | D27, S49               | M128, G130                      |                                                | 6.12±2.36  | 0.41±0.04 |
| G12   |         | M82                | E9, D27, G57           | L69, E79, N85, F118, T135       | A143, S145, T153, S162, L169                   | 7.91±0.85  | 0.53±0.04 |
| G13   | A7      |                    | V8, D27                |                                 |                                                | 2.17±0.59  | 0.35±0.02 |
| G14   |         | R97                | E17, D22, S49          | E101                            |                                                | 5.07±1.09  | 0.66±0.07 |
| G15   |         | L151               | D27, L33               |                                 | T155                                           | 5.99±2.72  | 0.51±0.09 |
| G16   |         | R73                | D16, D27, D28, R31     |                                 |                                                | 4.77±1.04  | 0.38±0.03 |
| G17   |         | I133, E16, T112    | A2                     | Q132                            |                                                | 5.11±0.93  | 0.46±0.03 |
| G18   |         | E91                | E9, A23, D27, G57, G59 | E79, N85, I125, T135            | S145, T153, S162, R163, R167, R168, 169L, A170 | 7.26±0.57  | 0.46±0.02 |
| G19   |         | F146               | A2                     |                                 |                                                | 4.26±0.73  | 0.57±0.00 |
| G20   |         | V103               | S49                    | G130                            |                                                | 4.15±0.86  | 0.47±0.09 |
| G21   |         | E78                |                        | L83                             |                                                | 5.21±3.54  | 0.53±0.00 |
| G22   | G15     |                    | R15                    |                                 |                                                | 9.47±3.55  | 0.41±0.00 |
| G23   |         | V120, Y126         |                        | Q132                            |                                                | 5.69±2.87  | 0.36±0.01 |
| G24   |         | S65                | A3, A5, E6, G57        | T135                            | A143, G147, K151                               | 3.16±1.09  | 0.52±0.04 |
| G25   |         | L141               | R35                    |                                 |                                                | 4.60±0.75  | 0.42±0.00 |
| G26   |         | P40                | D27                    |                                 | P157                                           | 8.49±1.92  | 0.45±0.09 |
| G27   |         | T58                | A23, D27, G57, G59     | E79, N85                        | S153, T155, P157, S162, R163, R167, L169, A170 | 7.61±0.66  | 0.42±0.02 |
| G28   |         | V68                | E17                    | L83, E101, F118                 |                                                | 5.14±2.32  | 0.38±0.01 |
| G29   |         | I155               | L33                    |                                 |                                                | 7.38±4.77  | 0.34±0.00 |
| G30   |         | M104               | R62                    |                                 |                                                | 6.21±0.78  | 0.39±0.00 |
| G31   |         | F63                | D28, S49               | E79, M128, G130                 | A143                                           | 5.28±0.87  | 0.40±0.04 |
| G32   | F11     |                    | D27, R44               |                                 |                                                | 4.94±1.11  | 0.43±0.07 |
| G33   |         | N106               | D27                    | E79, N85                        | S145, T153, T155, P157, S162, L169             | 7.84±0.66  | 0.44±0.03 |
| G34   | T3      |                    | D27                    |                                 | L169                                           | 4.79±1.38  | 0.36±0.00 |
| G35   |         | N88                | E9, A23, D27, N55      | L69, E79, N85, F118, T125, T135 | A143, S145, T153, S162, R163, L169, A170       | 7.65±0.79  | 0.51±0.03 |
| G36   | D10     |                    | D27                    |                                 |                                                | 2.11±0.90  | 0.37±0.00 |
| G37   |         | Q77                | V8, D27, R44, H58      | K126                            |                                                | 5.62±1.64  | 0.38±0.02 |
| G38   | G4, P12 |                    | D27, R40               |                                 |                                                | 3.89±0.97  | 0.41±0.04 |
| G39   |         | D121               | D27, R62               |                                 | T155                                           | 8.42±1.81  | 0.49±0.08 |
| G40   |         | I116               |                        | I125                            | T155                                           | 11.69±3.43 | 0.68±0.26 |
| G41   |         | A72                | R15, D27, N55          |                                 |                                                | 11.45±1.88 | 0.53±0.13 |

Nt: N-terminal; Ct: C-terminal; ρ: Pearson correlation coefficient; Dc: amino acid site variance; SE: standard error; RBD: RNA binding domain; The amino acids and positions were defined with OsY14b and OsMAGO2 as references, respectively. The group marked in green indicate the group that their residues were co-altered in both functional domains of Y14 and MAGO. The sites marked in red mean they were strictly clade-specific, the blue mean the amino acids changed but were not clade specific.
